# Supplementary material
Source: publisher site journal article supplement (https://www.dovepress.com/article/362535)

**SUPPLEMENTARY TABLE 1** TTF and OS in patient subgroups who received a starting afatinib dose of 40 mg

|  | **Median TTF  (months, 95% CI)** | **Median OS  (months, 95% CI)** |
| --- | --- | --- |
| All patients (n=147) | 30.6 (25.1–36.4) | 45.2 (41.7–NR) |
| Mutation type |  |  |
| Del19 (n=95) | 33.0 (27.7–40.3) | 63.5 (42.3–71.1) |
| L858R (n=52) | 25.3 (19.8–32.3) | 39.1 (29.3–NR) |
| Brain metastases present |  |  |
| No (n=121) | 31.2 (25.8–36.5) | 45.2 (41.7–71.1) |
| Yes (n=24) | 22.6 (17.9–NR) | 26.4 (19.1–NR) |
| ECOG PS |  |  |
| <2 (n=116) | 31.3 (25.8–38.2) | 63.5 (41.8–NR) |
| ≥2 (n=10) | 32.3 (8.0–NR) | 33.1 (17.1–NR) |

**Abbreviations:** CI, confidence interval; ECOG PS, Eastern Cooperative Oncology Group performance status; NR, not reached; OS, overall survival; TTF, time-to-treatment failure.

**SUPPLEMENTARY TABLE 2** List of institutional review boards/ethics committees that approved the GioTag and UpSwinG studies

| **GioTag** |
| --- |
| Ethikkommission der Stadt Wien |
| Ethikkommission Land OÖ |
| Ethikkommission für das Land Niederösterreich |
| Health Research Ethics Board of Alberta Cancer Committee |
| Medizinische Ethik-Kommission der Fakultät VI Medizin und Gesundheitswissenschaften |
| Helsinki Committee of Meir Medical Center |
| Helsinki Committee of Soroka University Medical Center |
| Helsinki Committee of Rambam Health Care Campus |
| Comitato Etico Unico Regionale del Friuli Venezia Giulia |
| Comitato Etico Area Vasta nord-ovest |
| Comitato Etico Fondazione Pascale, IRCCS, Istituto Nazionale dei Tumori |
| Comitato Etico, A.O.R.N. Dei Colli Plesso Monaldi |
| Comitato Etico Lazio 1, A.O. San Camillo Forlanini |
| Comitato etico ASL Lecce |
| Comitato Etico, Provincia di Brescia, ASST degli Spedali civili di Brescia |
| Comitato Etico per la sperimentazione clinica, Dell’Istituto Oncologico Veneto (IOV) |
| Comitato etico per la Sperimentazione Clinica (CESC) delle Province di Verona e Rovigo con sede presso AOUI di Verona Servizio di Farmacia dell'Ospedale Borgo Trento |
| Ethics committee of Kansai Medical University |
| Wakayama Medical University Independent Ethics Committee |
| Kanazawa University Medical Ethics Review Committee |
| Niigata Cancer Center Hospital Ethics Committee |
| Hokkaido University Hospital Ethical Committee |
| Kanagawa Cancer Center Research Ethics Review Comittee |
| Kyushu Cancer Center Ethic Committee |
| National Healthcare Group Pte Ltd - Domain Specific Review Board - Domain B1 |
| Komisija RS za medicinsko etiko |
| CEIC Hospital Universitari Germans Trias i Pujol |
| CEIC Hospital U. Severo Ochoa |
| CEIm Hospital Universitario Puerta de Hierro Majadahonda |
| CEIC Hospital Clínico San Carlos |
| Comité Ético de Investigación Clínica de Aragón |
| FISEBI Unidad de gestión de Ensayos Clinicos |
| Instituto de Investigación Sanitaria y Biomédica de Alicante |
| Comité Etico de la Investigación con Medicamentos de las Áreas de Salud de León y El Bierzo |
| Institution Review Board of Chi Mei Medical Center |
| Research Ethics Committee C National Taiwan University Hospital |
| Institution Review Board I&II Taichung Veterans General Hospital |
| Institution Review Board Kaohsiung Medical University Chung-Ho Memorial Hospital |
| Institution Review Board Taipei Veterans General Hospital |
| Research Ethics Committee China Medical University& Hospital |
| Institution Review Board Chang Gung Medical Foundation |
| Advarra |
| Institutional Review Board University of Nebraska Medical Center |
| Biomedical Research Alliance of New York (BRANY) |
| **UpSwinG** |
| Ethics Committee of the City of Vienna |
| Ethikkommission des Landes Oberösterreich |
| Aerztekammer Berlin |
| Comitato Etico Lazio 1 |
| Comitato Etico Interaziendale AOU Città della Salute e della Scienza di Torino |
| Istituto Nazionale Tumori Fondazione G. Pascale |
| Comitato Etico Area Vasta Nord Ovest |
| Comitato Etico di Area Vasta Centro |
| Comitato Etico della Provincia Monza Brianza |
| Comitato Etico Indipendente dell'IRCCS Centro di Riferimento Oncologico di Aviano (PN) |
| Comitato Etico Humanitas |
| IRB of Ajou University Hospital |
| IRB of Samsung Medical Center |
| IRB of Jeonbuk national university hospital |
| IRB of Pusan National University Hospital |
| IRB of Chonnam National University Hwasun Hospital |
| IRB of Gachon University Gil Medical Center |
| IRB of Inje University Haeundae Paik Hospital |
| IRB of Asan Medical Center |
| IRB of Kyung Hee University Hospital |
| IRB of Chungnam National University Hospital |
| IRB of Severance Hospital, Yonsei University Health System |
| IRB of Kyungpook National University Chilgok Hospital |
| IRB of Pusan National University Yangsan Hospital |
| CEIC Hospital Universitari Germans Trias i Pujol |
| Agencia Española del Medicamento y Productos Sanitarios (Spain) |
| CEIC Hospital Universitari Germans Trias i Pujol |
| CEIC HOSPITAL la Paz |
| CEIC Fundación Hospital Alcorcón |
| Hospital Universitario Fundacion Jimenez Diaz |
| CEIC Complejo Hospitalario de Jaen |
| National Taiwan University Hospital, Research Ethics Committee |
| China Medical University Hospital, Institutional Review Board |
| Kaohsiung Medical University Chung-Ho Memorial Hospital, Institutional Review Board |
| Taipei Veterans General Hospital, Institutional Review Board |
| Chang Gung Medical Foundation, Institutional Review Board |
| Taichung Veterans General Hospital, Institutional Review Board |
| NHS Health Research Authority |
| Wales Research Ethics Committee 6 |

**SUPPLEMENTARY FIGURE 1** TTF (A) and OS (B) in Asian patients receiving sequential afatinib (starting dose 40 mg) and osimertinib (n=147).
**Abbreviations:** CI, confidence interval; OS, overall survival; TTF, time-to-treatment failure.


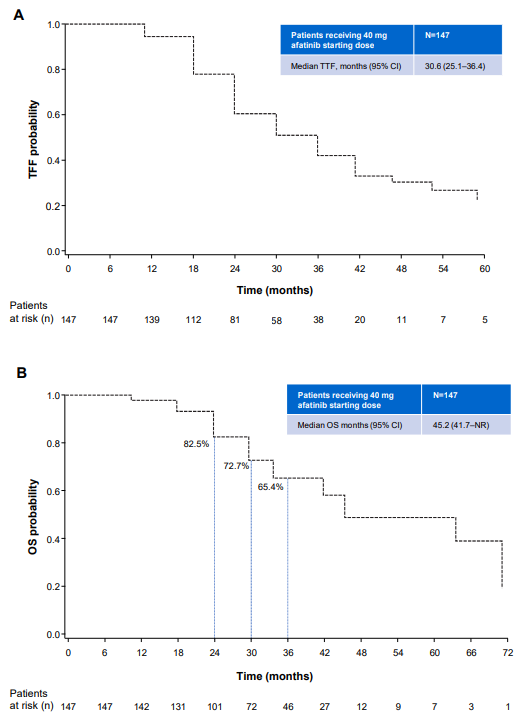


**SUPPLEMENTARY FIGURE 2** TTF (A) and OS (B) in Asian patients with a Del19 *EGFR* mutation receiving sequential afatinib (starting dose 40 mg) and osimertinib (n=95).
**Abbreviations:** CI, confidence interval; *EGFR*, epidermal growth factor receptor; OS, overall survival; TTF, time-to-treatment failure.


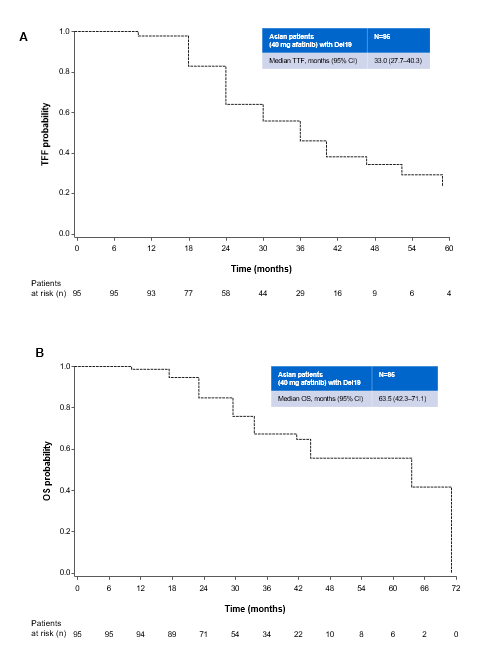

Supplement: Supplementary file 1 [file get_supplementary_file.php]
